# Supplementary material for: Surgical Mask Use in Physical Exercise in Young Healthy Subjects - SUME Trial
Source: Preprints.org preprint supplement (doi:10.20944/preprints202102.0153.v1), 2021-02-05
Supplement: Supplementary file 1 [file supplementary]

COMISSÃO DE ÉTICA PARA A SAÚDE DO HOSPITAL PARTICULAR DO ALGARVE  
PARECER Nº 06/2020

**Assunto:** Estudo “AVALIAÇÃO DO IMPACTO DO USO DE MÁSCARA CIRÚRGICA NA ACTIVIDADE FÍSICA (INTERPRETAÇÃO FEITA COM REALIZAÇÃO DE PROVA DE ESFORÇO CARDIOVASCULAR)”

Nos termos e para os efeitos do disposto na alínea a), do nº 1 do art.º 9º da Lei nº 21/2014 de 16 de abril, foi solicitado o parecer desta Comissão, tendo em vista a autorização para a realização do estudo acima identificado.

No âmbito das competências que lhe são conferidas pelo art.º 3º do Decreto-Lei nº 80/2018 de 15 de outubro e pelo do art.º 16º da Lei nº 21/2014 de 16 de abril, a Comissão de Ética para a Saúde do Hospital Particular do Algarve, doravante designada por Comissão, analisou o processo que lhe foi apresentado para aquele efeito e avaliou todos os aspetos apontados no nº 6 do referido art.º 16º.

**1. Pertinência do estudo e sua conceção:**

De acordo com a informação prestada a esta Comissão a realização deste estudo torna-se pertinente uma vez que pretende avaliar o impacto do uso de máscara cirúrgica durante a prática da atividade física, cuja medição se efetuará durante a realização da prova de marcha.

Tendo em conta a presente pandemia por SARS-COV-2, onde a utilização de máscara cirúrgica passou a ser uma obrigatoriedade quase transversal, o desenvolvimento desta investigação e o conhecimento que possa daí advir, apresentam-se pertinentes, adequados e atuais. Desta forma, a presente investigação tem como objetivo principal avaliar os parâmetros cardiovasculares em esforço com e sem uso de máscara cirúrgica durante a realização de uma prova de esforço.

**2. Avaliação dos benefícios e riscos previsíveis:**

Os benefícios não estão explícitos, para além daqueles nomeados nos aspetos concetuais anteriores. A previsão de riscos associados ao estudo está omissa.

**3. O protocolo, incluindo os planos de divulgação do estudo:**

Handwritten initials and a signature in the top right corner.

Os pacientes serão convidados a participar no estudo depois de lhes ser explicado o seu objetivo e darem o seu consentimento informado.

Prevê-se que o estudo seja divulgado através de um artigo científico.

#### **4. Aspetos metodológicos, incluindo o instrumento de colheita de dados e os aspetos éticos e de confidencialidade:**

Pela informação prestada a esta Comissão, parece-nos adequada a metodologia adotada.

Está contemplado o recrutamento da amostra, contudo os fatores de inclusão/exclusão dos participantes estão omissos, com exceção de que serão considerados os “indivíduos entre os 18 e 40 anos que seja demonstrado terem um teste SARS-COV-2 negativo”. Este último aspeto deverá merecer por parte dos investigadores alguma reflexão, por forma a minorar o risco de viés.

O descritivo do desenho da investigação está contemplado.

É referido que a recolha de dados inclui o teste de perceção de Borg (0-10), a avaliação da saturação de oxigénio para além dos parâmetros normais avaliados nas provas de esforço.

São referidos os testes estatísticos para o tratamento de dados, apesar de não estar descrito o nível de significância, nem o intervalo de confiança.

O projeto contempla a “entrega de documentação explicativa do estudo e do seu modo de condução aos participantes e a autorização para processamento de dados por parte dos participantes”.

#### **5. A aptidão do investigador principal e dos restantes membros da equipa:**

O investigador principal - Dr. Hugo Café - é médico cardiologista e exerce desde há vários anos o exercício da profissão no local onde decorrerá o estudo.

Dessa forma, as suas qualificações indicam que estará apto a exercer a sua tarefa e a liderar a investigação.

Face ao exposto e, considerando os documentos entregues para a avaliação e a sua fundamentação, parece-nos que o presente projeto de investigação cumpre os compromissos éticos e o respeito dos princípios deontológicos e legais específicos para estas situações, o que permite que esta Comissão profira um parecer favorável.

Portimão, 27 de julho de 2020

*Ana Paula Fontes*

Consultora do Núcleo de Formação e Desenvolvimento Profissional

Vice-Presidente da Comissão de Ética para a Saúde

Grupo Hospital Particular do Algarve

Portimão  
*Ana Paula Fontes*  
Ana Paula Fontes
